# Supplementary material
Source: Springer Nature journal article supplement (https://www.springermedizin.de/resource/supplementary/13000_2009_255_MOESM2_ESM.pdf/9624170)

**a**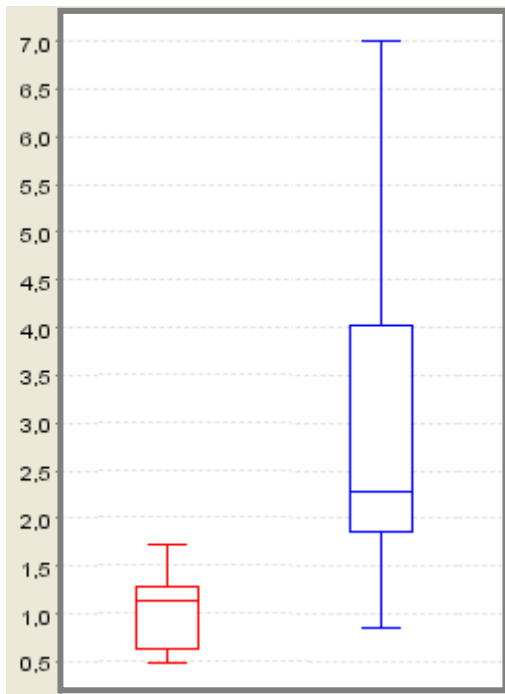

N Stroma

Tu Stroma

**b**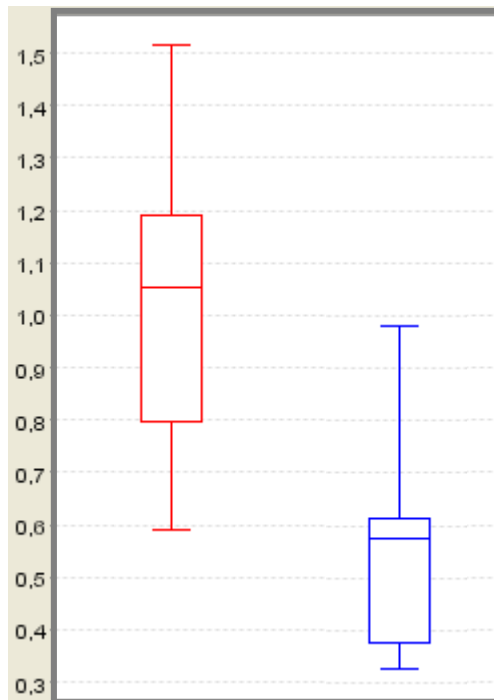

N Stroma

Tu Stroma

Supplement: MOESM2 [file 9624170]
